# Supplementary material
Source: publisher site journal article supplement (https://www.spandidos-publications.com/4886/downloadSupplementary)

Figure S1. Observation of isolated brain mitochondria using optical microscopy. (A) non-purified mitochondria, (B) purified mitochondria. Magnification x400; scale bar=50  $\mu\text{m}$ .

A

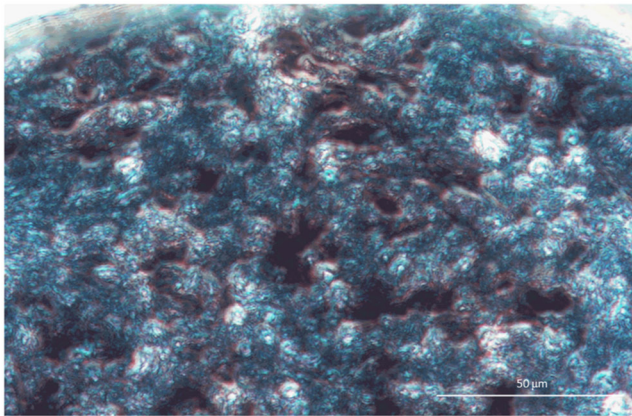

B

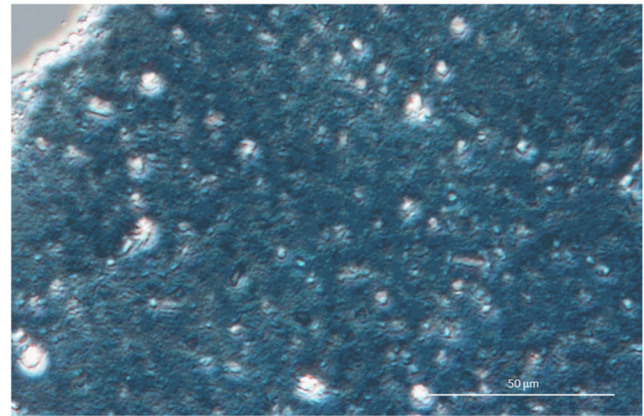

Figure S2. TIC of sham group samples. The abscissa is the retention time of the detection and the ordinate is the ion current intensity flow of the ion detection. (A) sample 1, (B) sample 2, (C) sample 3, (D) sample 4, (E) sample 5 and (F) sample 6. TIC, total ion chromatogram.

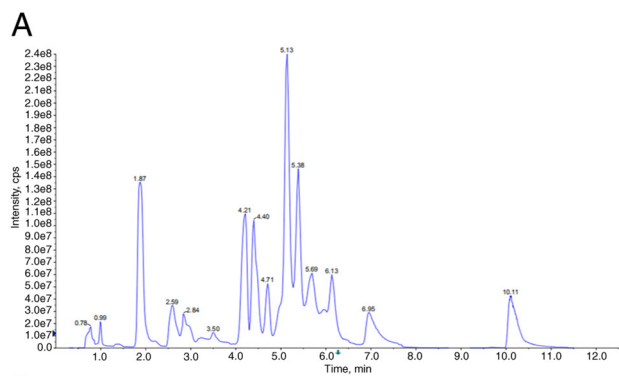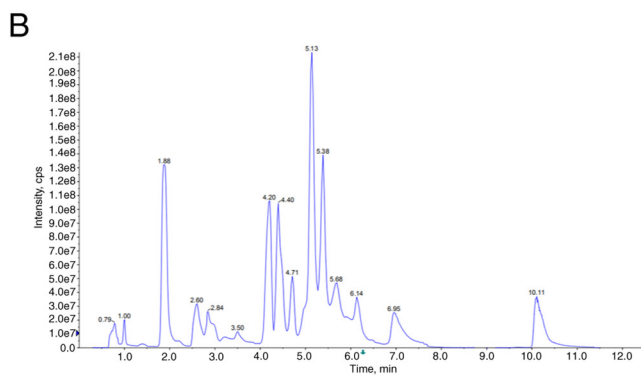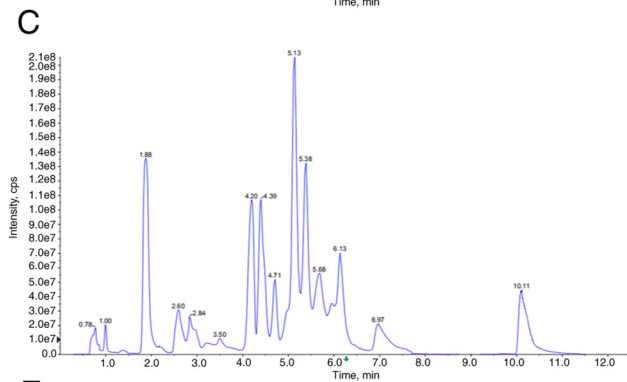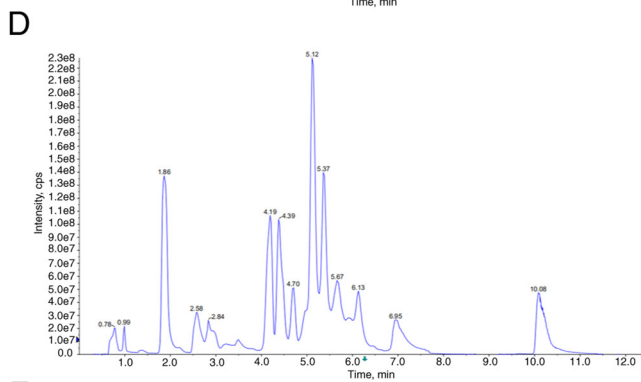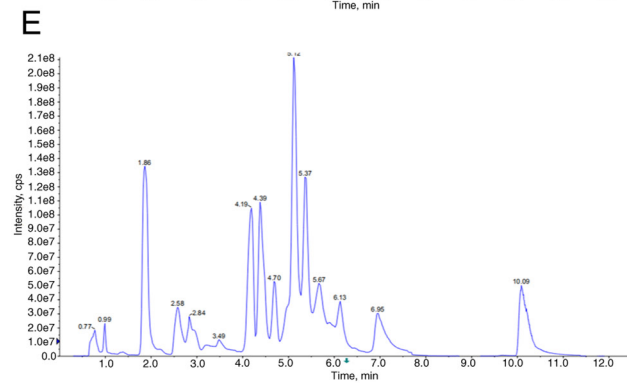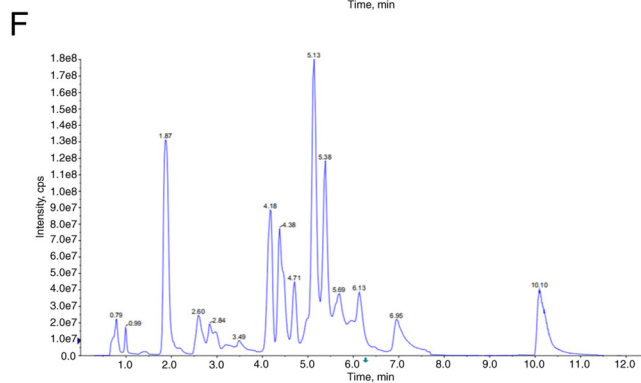

Figure S3. TIC of model group samples. The abscissa is the retention time of the detection and the ordinate is the ion current intensity flow of the ion detection. (A) sample 1, (B) sample 2, (C) sample 3, (D) sample 4, (E) sample 5 and (F) sample 6. TIC, total ion chromatogram.

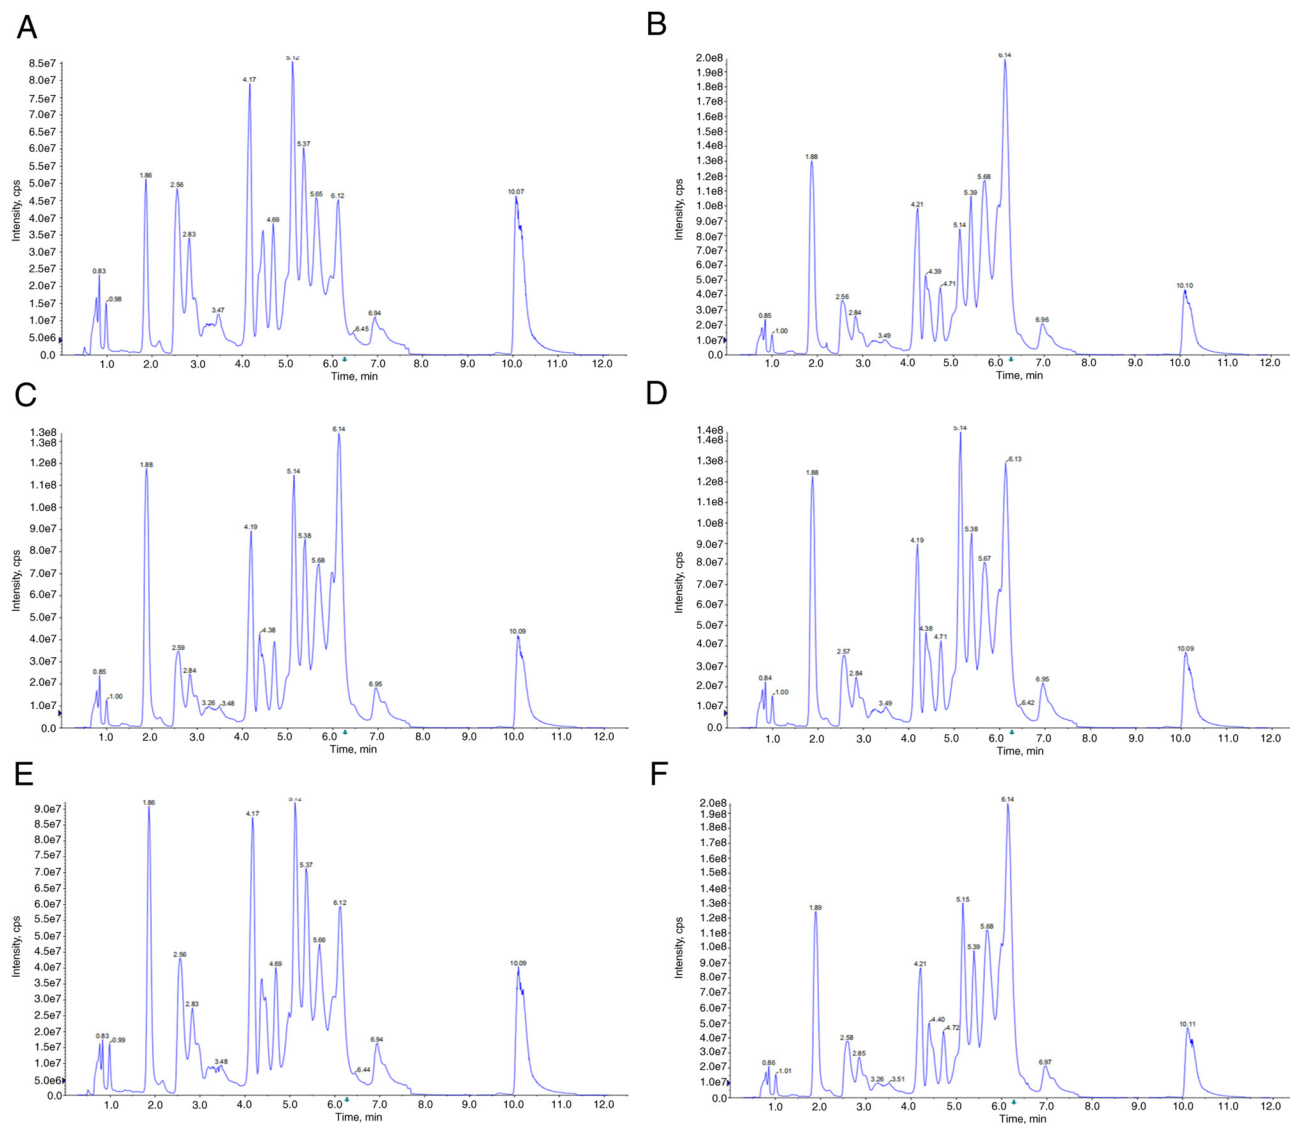

Figure S4. TIC of treat group samples. The abscissa is the retention time of the detection and the ordinate is the ion current intensity flow of the ion detection. (A) sample 1, (B) sample 2, (C) sample 3, (D) sample 4, (E) sample 5 and (F) sample 6. TIC, total ion chromatogram.

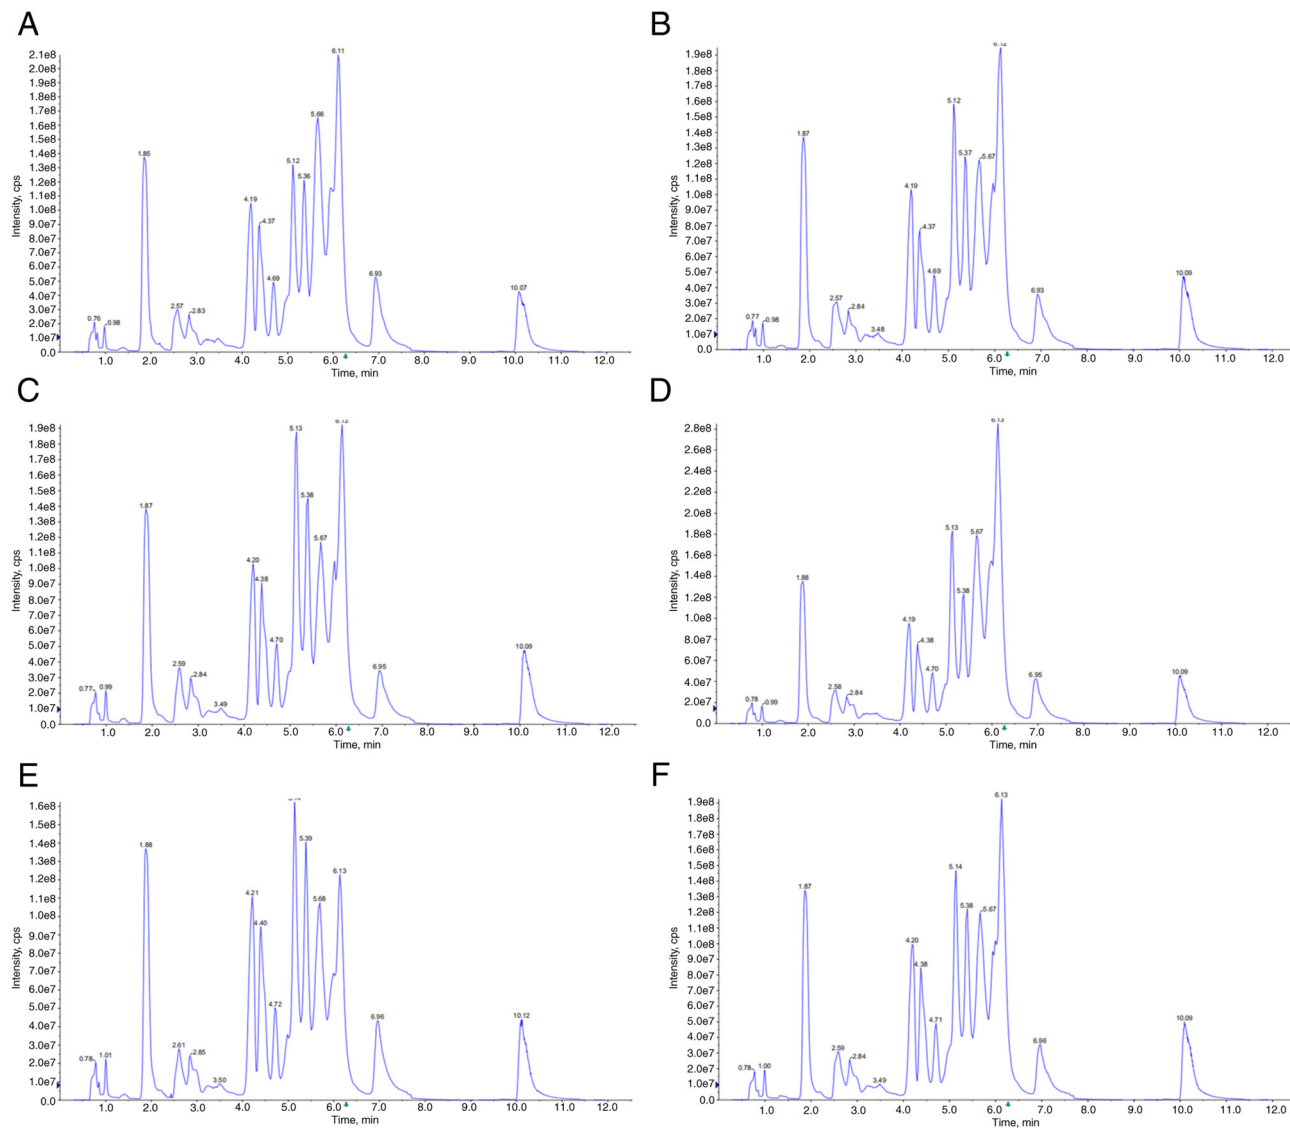

Supplement: Supplementary file 1 [file downloadSupplementary]
